# Supplementary material for: The role of biocatalysis in the asymmetric synthesis of alkaloids – an update
Source: Royal Society of Chemistry journal article supplement (doi:10.1039/d1ra04181a), 2021-01-01
Supplement: d1ra04181a1.pdf [file d1ra04181a1.pdf]

# Developments in Chemo-Enzymatic Alkaloid Synthesis via Biocatalytic Transformations

RSC  
Advances

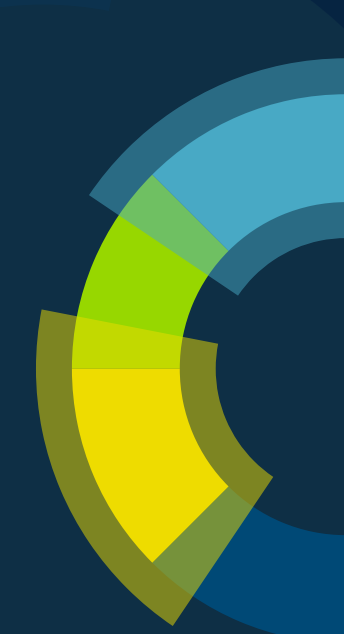

**Biocatalysts are a valuable tool for alkaloid synthesis**

Biocatalysis

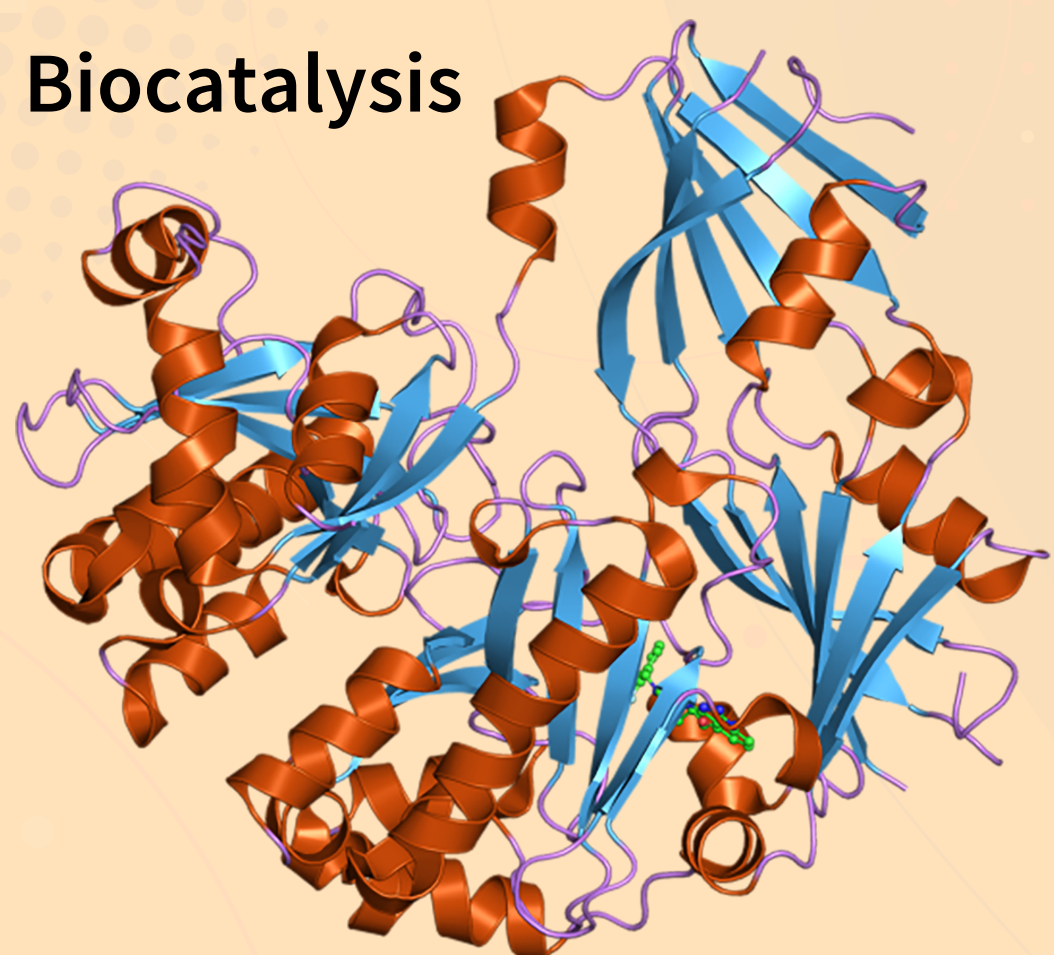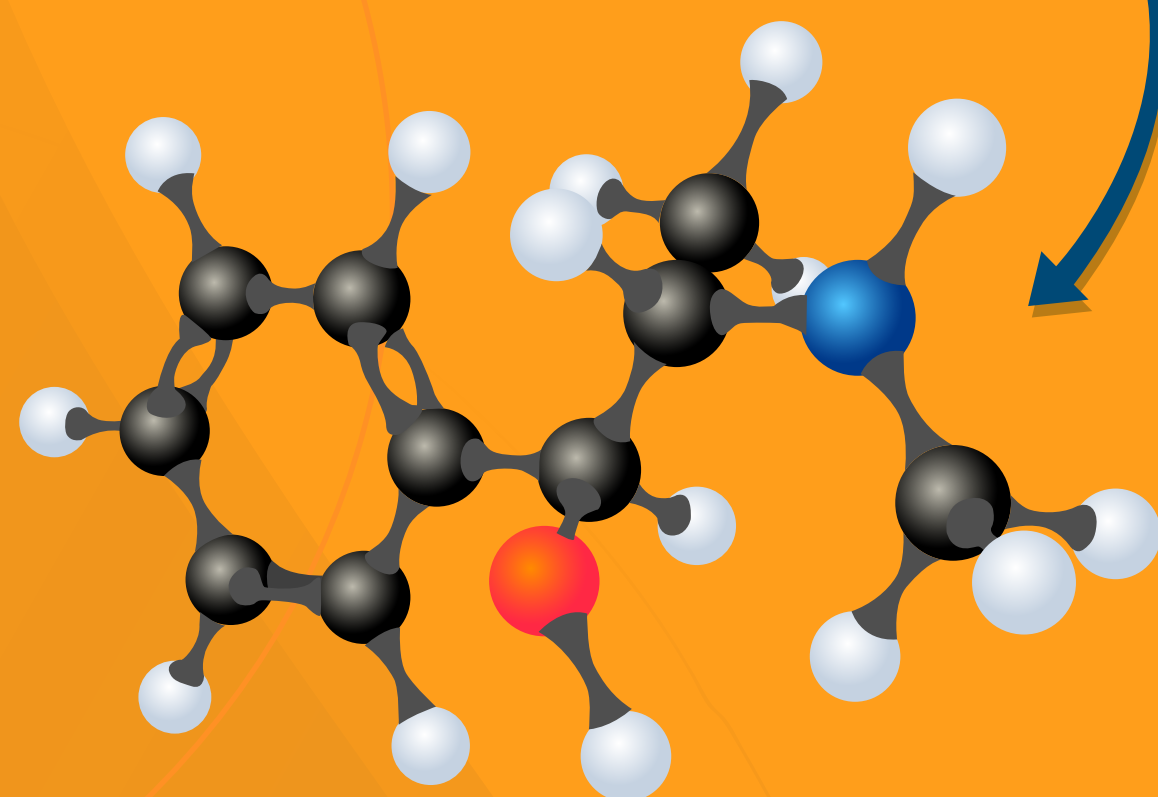

Alkaloid synthesis

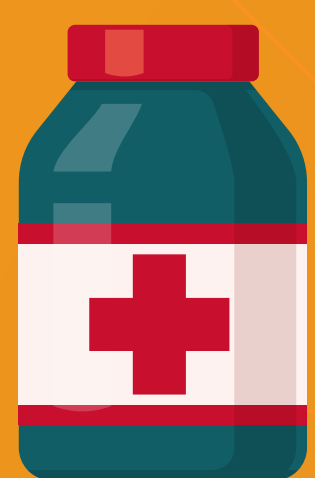

Medicinal use

**Integration of biocatalysts for chemo-enzymatic alkaloid synthesis could solve large-scale production challenges**

**Modern developments in biocatalytic engineering and alkaloid synthesis**

**C-C  
C-N**

Biocatalytic key C-C and C-N bond formation

**C=N**

Biocatalytic imine reduction

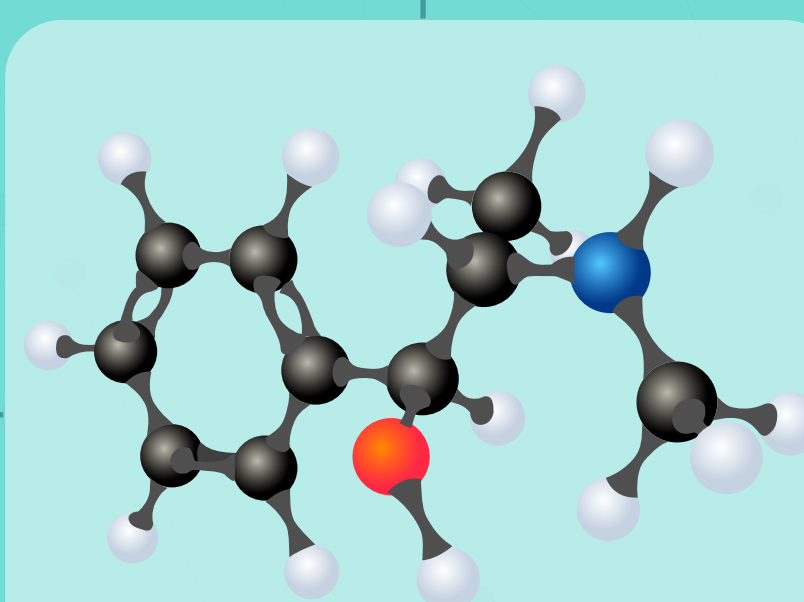

Alkaloid synthesis

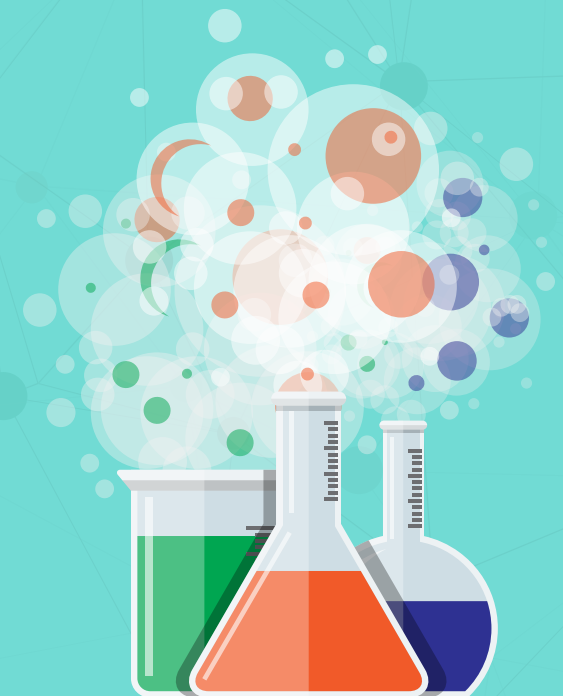

Chiral building block approach

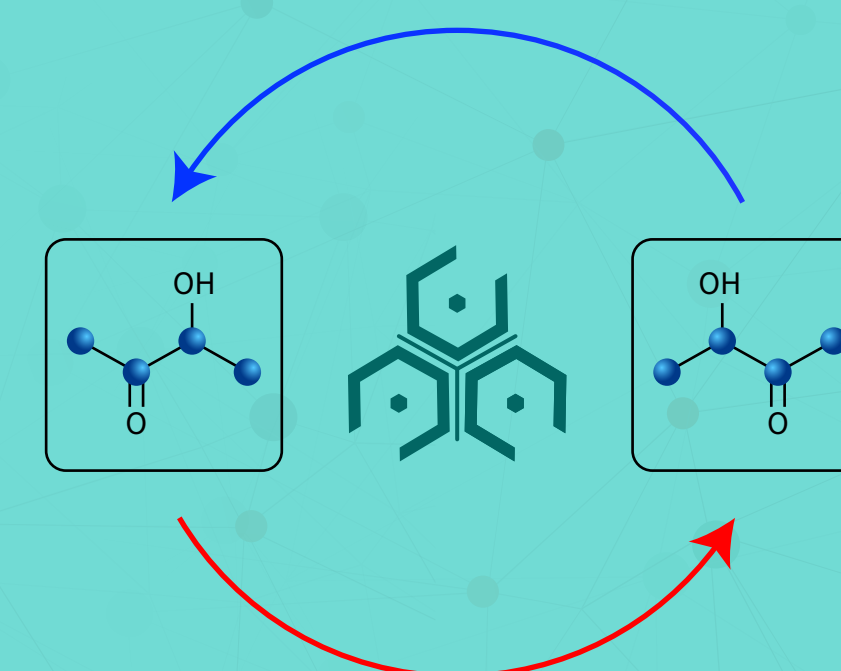

Kinetic resolution, dynamic kinetic resolution, and deracemisation

Shorter chemo-enzymatic syntheses are an economically viable option

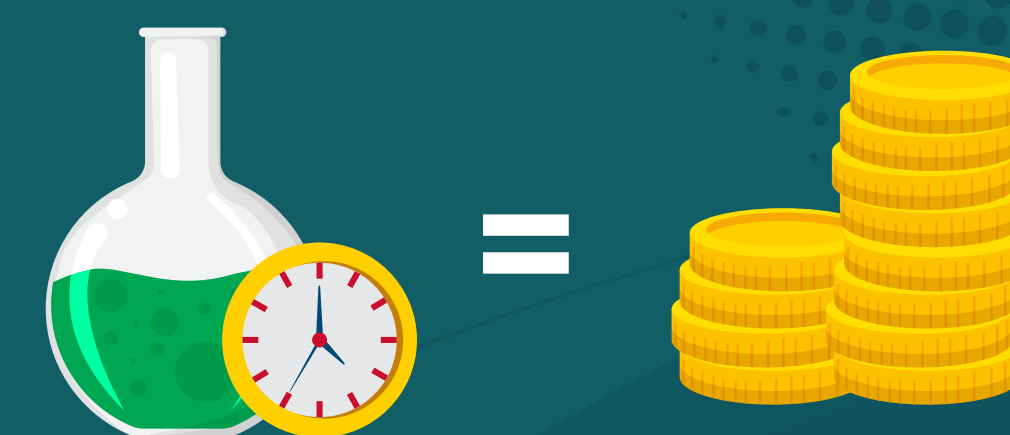

**Collaborative efforts are essential to exploiting the new chemo-enzymatic approaches to alkaloid synthesis**
